# Supplementary material
Source: Springer Nature journal article supplement (https://www.springermedizin.de/resource/supplementary/12916_2011_524_MOESM8_ESM.pdf/9598066)

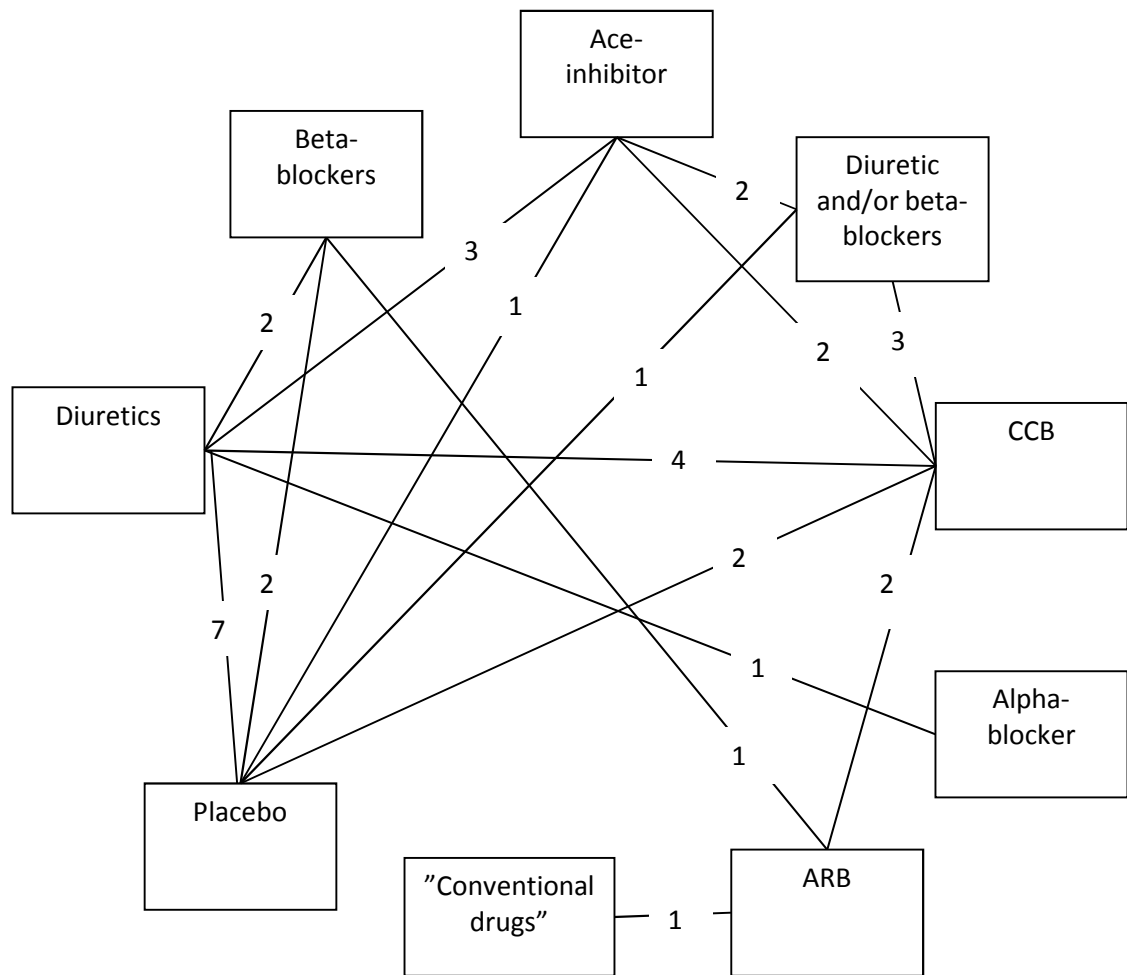

Supplement: MOESM8 [file 9598066]
